# Supplementary material
Source: ML conference proceedings conference paper supplement (https://openreview.net/forum?id=qk1qpCN-k6)
Supplement: supplementary_material [file attachment]

---

# Supplementary Material:

## Information bottleneck theory of high-dimensional regression: relevancy, efficiency and optimality

---

Vudtiwat Ngampruetikorn,\* David J. Schwab  
 Initiative for the Theoretical Sciences, The Graduate Center, CUNY  
 \*vngampruetikorn@gc.cuny.edu

### A Information content of maximally efficient algorithms

Consider an IB problem where we are interested in an information efficient representation of  $Y$  that is predictive of  $W$  (Fig 1a). When  $Y$  and  $W$  are Gaussian correlated, the central object in constructing an IB solution is the normalized regression matrix  $\Sigma_{Y|W}\Sigma_Y^{-1}$ ; in particular, its eigenvalues  $\nu_i[\Sigma_{Y|W}\Sigma_Y^{-1}]$  completely characterize the information content of the IB optimal representation  $\tilde{T}$  via (see Ref [1] for a derivation)

$$I(\tilde{T}; W) = \frac{1}{2} \sum_{i=1}^N \max\left(0, \ln \frac{1 - \gamma^{-1}}{\nu_i[\Sigma_{Y|W}\Sigma_Y^{-1}]}\right) \quad (1)$$

$$I(\tilde{T}; Y | W) = \frac{1}{2} \sum_{i=1}^N \max(0, \ln(\gamma(1 - \nu_i[\Sigma_{Y|W}\Sigma_Y^{-1}]))), \quad (2)$$

where  $N$  is the dimension of  $Y$  and  $\gamma$  parametrizes the IB trade-off [Eq (1)].

Our work focuses on the following generative model for  $W$  and  $Y$  (see Sec 1.1)

$$W \sim N(0, \frac{\omega^2}{P} I_P) \quad \text{and} \quad Y | W \sim N(X^T W, \sigma^2 I_N). \quad (3)$$

Marginalizing out  $W$  yields

$$Y \sim N(0, \sigma^2 I_N + \frac{1}{P} X^T X). \quad (4)$$

As a result, the normalized regression matrix reads

$$\Sigma_{Y|W}\Sigma_Y^{-1} = \sigma^2 I_N \frac{1}{\sigma^2 I_N + \frac{1}{P} X^T X} = \left( I_N + \frac{1}{\lambda^*} \frac{X^T X}{N} \right)^{-1} \quad \text{where} \quad \lambda^* \equiv \frac{P \sigma^2}{N \omega^2}. \quad (5)$$

Substituting Eq (5) into Eqs (1-2) gives

$$I(\tilde{T}; W) = \frac{1}{2} \sum_{i=1}^N \max\left(0, \ln\left((1 - \gamma^{-1})(1 + \phi_i[X^T X/N]/\lambda^*)\right)\right) \quad (6)$$

$$I(\tilde{T}; Y | W) = \frac{1}{2} \sum_{i=1}^N \max\left(0, \ln \frac{\gamma \phi_i[X^T X/N]}{\lambda^* + \phi_i[X^T X/N]}\right), \quad (7)$$

where  $\phi_i[X^T X/N]$  denote the eigenvalues of  $X^T X/N$ . Since the eigenvalues of  $X^T X/N$  and the sample covariance  $\Psi = XX^T/N$  are identical except for the zero modes which do not contribute to information, we can recast the above equations as

$$I(\tilde{T}; W) = \frac{1}{2} \sum_{i=1}^P \max\left(0, \ln(1 - \gamma^{-1})(1 + \psi_i/\lambda^*)\right) \quad (8)$$

$$I(\tilde{T}; Y | W) = \frac{1}{2} \sum_{i=1}^P \max\left(0, \ln \frac{\gamma \psi_i}{\lambda^* + \psi_i}\right), \quad (9)$$

where  $\psi_i$  are the eigenvalues of  $\Psi$  and the summation limits change to  $P$ , the number of eigenvalues of  $\Psi$ . Introducing the cumulative spectral distribution  $F^\Psi$  and replacing the summations with integrals results in

$$I(\tilde{T}; W) = \frac{P}{2} \int dF^\Psi(\psi) \max\left(0, \ln\left((1 - \gamma^{-1})(1 + \psi/\lambda^*)\right)\right) \quad (10)$$

$$I(\tilde{T}; Y | W) = \frac{P}{2} \int dF^\Psi(\psi) \max\left(0, \ln\frac{\gamma\psi}{\lambda^* + \psi}\right). \quad (11)$$

We see that the contributions to the integrals come from the logarithms but only when they are positive. This condition can be recast into integration limits (note that  $\gamma > 0$  and  $\lambda^* > 0$ )

$$\ln\left((1 - \gamma^{-1})(1 + \psi/\lambda^*)\right) > 0 \implies \psi > \lambda^*/(\gamma - 1) \quad (12)$$

$$\ln\frac{\gamma\psi}{\lambda^* + \psi} > 0 \implies \psi > \lambda^*/(\gamma - 1). \quad (13)$$

Finally we define the lower cutoff  $\psi_c \equiv \lambda^*/(\gamma - 1)$  and use the above limits to rewrite the expressions for relevant and residual informations,

$$I(\tilde{T}; W) = \frac{P}{2} \int_{\psi > \psi_c} dF^\Psi(\psi) \ln\frac{\psi + \lambda^*}{\psi_c + \lambda^*} = \frac{P}{2} \int_{\psi > \psi_c} dF^\Psi(\psi) \ln\left(1 + \frac{\psi - \psi_c}{\psi_c + \lambda^*}\right) \quad (14)$$

$$I(\tilde{T}; Y | W) = \frac{P}{2} \int_{\psi > \psi_c} dF^\Psi(\psi) \ln\frac{\psi}{\psi_c} - I(\tilde{T}; W). \quad (15)$$

These equations are identical to Eqs (8-9) in the main text.

## B Information content of Gibbs-posterior regression

To compute the information content of Gibbs regression [Eq (14)], we first recall that the mutual information between two Gaussian correlated variables,  $A$  and  $B$ , is given by

$$I(A; B) = \frac{1}{2} \ln \det \Sigma_A \Sigma_{A|B}^{-1}, \quad (16)$$

where  $\Sigma_A$  is the covariance of  $A$ , and  $\Sigma_{A|B}$  of  $A | B$ .

We now write down the relevant information, using the covariances  $\Sigma_{T|W}$  and  $\Sigma_T$  from Eqs (17-18),

$$I(T; W) = \frac{1}{2} \ln \det \left( \Sigma_T \Sigma_{T|W}^{-1} \right) \quad (17)$$

$$= \frac{1}{2} \ln \det \frac{\frac{1}{2\beta} \frac{1}{\Psi + \lambda I_P} + \frac{\sigma^2}{N} \frac{\Psi}{(\Psi + \lambda I_P)^2} + \frac{\omega^2}{P} \frac{\Psi^2}{(\Psi + \lambda I_P)^2}}{\frac{1}{2\beta} \frac{1}{\Psi + \lambda I_P} + \frac{\sigma^2}{N} \frac{\Psi}{(\Psi + \lambda I_P)^2}} \quad (18)$$

$$= \frac{1}{2} \ln \det \left( I_P + \frac{\Psi^2/\lambda^*}{\Psi + \frac{N}{2\beta\sigma^2}(\Psi + \lambda I_P)} \right) \quad (19)$$

$$= \frac{1}{2} \text{tr} \ln \left( I_P + \frac{\Psi^2/\lambda^*}{\Psi + \frac{N}{2\beta\sigma^2}(\Psi + \lambda I_P)} \right) \quad (20)$$

$$= \frac{1}{2} \sum_{i=1}^P \ln \left( 1 + \frac{\psi_i^2/\lambda^*}{\psi_i + \frac{N}{2\beta\sigma^2}(\psi_i + \lambda)} \right) \quad (21)$$

$$= \frac{P}{2} \int_{\psi > 0} dF^\Psi(\psi) \ln \left( 1 + \frac{\psi^2/\lambda^*}{\psi + \frac{N}{2\beta\sigma^2}(\psi + \lambda)} \right), \quad (22)$$

where  $\lambda^* = P\sigma^2/N\omega^2$ . In the above, we use the identity  $\ln \det H = \text{tr} \ln H$  which holds for any positive-definite Hermitian matrix  $H$ , let  $\psi_i$  denote the eigenvalues of the sample covariance  $\Psi$  and introduce  $F^\Psi$ , the cumulative distribution of eigenvalues. We also assume that  $\lambda$  and  $\beta$  are finite

and positive. Note that the integral is limited to positive real numbers because the eigenvalues of a covariance matrix is non-negative and the integrand vanishes for  $\psi = 0$ .

Following the same logical steps as above and noting that the Markov constraint  $W \leftrightarrow Y \leftrightarrow T$  implies  $\Sigma_{T|Y,W} = \Sigma_{T|Y}$ , we write down the residual information,

$$I(T; Y | W) = \frac{1}{2} \ln \det \left( \Sigma_{T|W} \Sigma_{T|Y,W}^{-1} \right) \quad (23)$$

$$= \frac{1}{2} \ln \det \left( \Sigma_{T|W} \Sigma_{T|Y}^{-1} \right) \quad (24)$$

$$= \frac{1}{2} \ln \det \left( \frac{\frac{1}{2\beta} \frac{1}{\Psi + \lambda I_P} + \frac{\sigma^2}{N} \frac{\Psi}{(\Psi + \lambda I_P)^2}}{\frac{1}{2\beta} \frac{1}{\Psi + \lambda I_P}} \right) \quad (25)$$

$$= \frac{P}{2} \int_{\psi > 0} dF^\Psi(\psi) \ln \left( 1 + \frac{2\beta\sigma^2}{N} \frac{\psi}{\psi + \lambda} \right) \quad (26)$$

where we use the covariance matrices  $\Sigma_{T|W}$  and  $\Sigma_{T|Y}$  from Eqs (17) & (14).

### C Marchenko-Pastur law

Consider  $X = \Sigma^{1/2}Z$  where  $Z \in \mathbb{R}^{P \times N}$  is a matrix with iid entries drawn from a distribution with zero mean and unit variance, and  $\Sigma \in \mathbb{R}^{P \times P}$  is a covariance matrix. In addition we take the asymptotic limit  $N \rightarrow \infty$ ,  $N \rightarrow \infty$  and  $P/N \rightarrow \alpha \in (0, \infty)$ . If the population spectral distribution  $F^\Sigma$  converges to a limiting distribution, the spectral distribution of the sample covariance  $\Psi = XX^T/N$  becomes deterministic [2]. The density,  $f^\Psi(\psi) = dF^\Psi(\psi)/d\psi$ , is related to its Stieltjes transform  $m(z)$  via

$$f^\Psi(\psi) = \frac{1}{\pi} \text{Im } m(\psi + i0^+), \quad \psi \in \mathbb{R}. \quad (27)$$

We can obtain  $f^\Psi$  by solving the Silverstein equation for the companion Stieltjes transform  $v(z)$  [3],

$$-\frac{1}{v(z)} = z - \alpha \int_{\mathbb{R}^+} dF^\Sigma(s) \frac{s}{1 + sv(z)}, \quad z \in \mathbb{C}^+, \quad (28)$$

and using the relation

$$m(z) = \alpha^{-1}(v(z) + z^{-1}) - z^{-1}. \quad (29)$$

Here  $\mathbb{C}^+$  denotes the upper half of the complex plane.

## D Supplementary figure

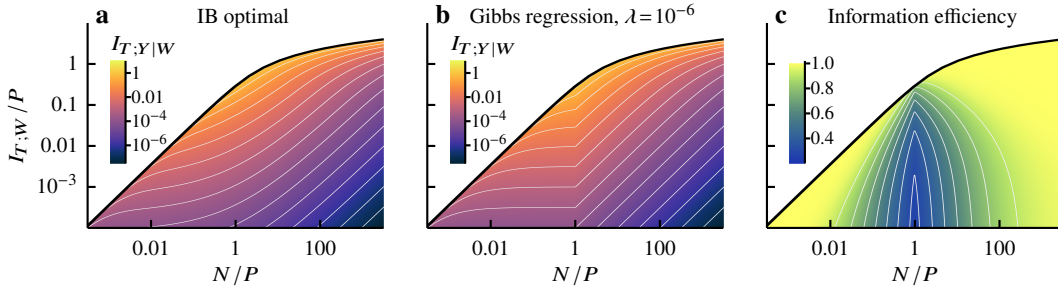

Figure 1: Gibbs ridge regression is least information efficient around  $N/P=1$ . **a** Residual information  $I(T;Y|W)$  of the IB optimal algorithm over a range of sample densities  $N/P$  (horizontal axis) and given extracted relevant bits  $I(T;W)$  (vertical axis). The extracted relevant bits are bounded by the available relevant bits in the data (black curve), i.e., the data processing inequality implies  $I(T;W) \leq I(Y;W)$ . **b** Same as (a) but for Gibbs regression with  $\lambda=10^{-6}$ . Holding other things equal, Gibbs regression estimators encode more residual bits than optimal representations. **c** Information efficiency, the ratio between residual bits in optimal representations (a) and Gibbs estimator (b), is minimum around  $N/P=1$ . Here we set  $\omega^2/\sigma^2=1$  and let  $P, N \rightarrow \infty$  at the same rate such that the ratio  $N/P$  remains fixed and finite. The eigenvalues of the sample covariance follow the standard Marchenko-Pastur law (see Sec 4).

## References

- [1] G. Chechik, A. Globerson, N. Tishby, and Y. Weiss, Information bottleneck for Gaussian variables, *Journal of Machine Learning Research* **6**, 165 (2005).
- [2] V. A. Marčenko and L. A. Pastur, Distribution of eigenvalues for some sets of random matrices, *Mathematics of the USSR–Sbornik* **1**, 457 (1967).
- [3] J. Silverstein and S. Choi, Analysis of the Limiting Spectral Distribution of Large Dimensional Random Matrices, *Journal of Multivariate Analysis* **54**, 295 (1995).
